# Supplementary material for: Sensory Improvement of a Pea Protein-Based Product Using Microbial Co-Cultures of Lactic Acid Bacteria and Yeasts
Source: PubMed Central journal article supplement (PMC7143830; doi:10.3390/foods9030349), 2020-03-17
Supplement: foods-09-00349-s001.pdf [file foods-09-00349-s001.pdf]

**Table S 1** Amount of residual sugars in the fermented samples (g/L).

|                   | <b>Residual sugars at tf</b> |                |                 |
|-------------------|------------------------------|----------------|-----------------|
|                   | <b>Sucrose</b>               | <b>Glucose</b> | <b>Fructose</b> |
| <b>VEGE</b>       | 24.6 a                       | < 0.001 d      | 0.8 c           |
| <b>VEGE + KM</b>  | < 0.001 b                    | 3.3 c          | 9.9 b           |
| <b>VEGE + KL</b>  | 0.27 b                       | 7.5 a          | 13 a            |
| <b>VEGE + TOR</b> | 0.4 b                        | 5.6 b          | 10 b            |

Means in the same column with different letters are significantly different ( $p < 0.05$ ).

**Table S 2** Volatile compounds identified in the non-fermented and fermented pea samples  
(expressed as the surface area of the peaks).

| Families  | Volatile compounds         | Uninoculated | VEGE     | VEGE + KM | VEGE + KL | VEGE +TOR |
|-----------|----------------------------|--------------|----------|-----------|-----------|-----------|
| Aldehydes | 2-methylpropanal           | 2.29E+06     | 3.99E+05 | 2.3E+07   | 4.01E+07  | 2.25E+07  |
|           | Butanal                    | 8.46E+06     | < DL     | < DL      | < DL      | < DL      |
|           | 3-methylbutanal            | 5.08E+06     | < DL     | 3.3E+06   | 8.65E+06  | 2.88E+06  |
|           | 2-methylbutanal            | 2.99E+06     | < DL     | 2.7E+06   | 1.07E+07  | 3.82E+06  |
|           | Pentanal                   | 9.48E+06     | < DL     | < DL      | < DL      | < DL      |
|           | Trans -2-methyl-2-butenal  | 1.27E+05     | 5.11E+04 | < DL      | < DL      | < DL      |
|           | Hexanal                    | 6.85E+07     | < DL     | < DL      | < DL      | < DL      |
|           | 2-ethyl-2-butenal          | 5.42E+04     | 3.19E+04 | < DL      | < DL      | < DL      |
|           | (E)-2-hexenal              | 5.81E+04     | < DL     | < DL      | < DL      | < DL      |
|           | Heptanal                   | 2.59E+06     | < DL     | < DL      | < DL      | < DL      |
|           | (E)-2-heptenal             | 6.35E+04     | 2.01E+04 | < DL      | < DL      | < DL      |
|           | Benzaldehyde               | < DL         | 1.19E+05 | < DL      | < DL      | < DL      |
|           | Octanal                    | 2.44E+06     | < DL     | < DL      | < DL      | < DL      |
|           | 2-ethyl-2-hexenal          | 3.25E+05     | 1.65E+05 | < DL      | < DL      | < DL      |
|           | Nonanal                    | 2.06E+06     | < DL     | < DL      | < DL      | < DL      |
|           | 3-ethyl benzaldehyde       | 5.96E+04     | 8.25E+03 | < DL      | < DL      | < DL      |
|           | Decanal                    | 2.15E+05     | < DL     | < DL      | < DL      | < DL      |
|           | Cis-undec-4-enal           | < DL         | 3.66E+04 | < DL      | < DL      | < DL      |
|           | (E)-2-octenal              | 3.71E+05     | < DL     | < DL      | < DL      | < DL      |
|           | Dodecanal                  | 9.16E+04     | < DL     | < DL      | < DL      | < DL      |
| Ketones   | Acetone                    | 4.24E+06     | < DL     | < DL      | 1.14E+06  | 8.93E+04  |
|           | 2,3-butanedione            | 5.93E+04     | 4.18E+06 | < DL      | 6.48E+06  | < DL      |
|           | 2-butanone                 | < DL         | 5.76E+05 | < DL      | 3.14E+06  | 6.81E+05  |
|           | 2-pentanone                | 5.93E+05     | 1.43E+05 | < DL      | 1.63E+06  | 4.29E+05  |
|           | 2,3-pentanedione           | < DL         | 4.62E+06 | < DL      | 3.49E+06  | 1.99E+05  |
|           | 4-methyl-2-pyrazolin-5-one | < DL         | 5.75E+04 | < DL      | < DL      | < DL      |
|           | 2,3-Hexanedione            | < DL         | 5.79E+04 | < DL      | < DL      | < DL      |
|           | 2-hexanone                 | 5.90E+05     | 1.87E+05 | < DL      | 8.60E+05  | 1.82E+05  |
|           | 4-methyl-3-penten-2-one    | < DL         | < DL     | < DL      | 1.02E+06  | < DL      |
|           | 1-(2-furyl)-1-propanone    | 3.20E+05     | 3.09E+04 | < DL      | < DL      | 6.01E+04  |
|           | 2- heptanone               | 1.37E+07     | 3.91E+06 | 8.2E+05   | 1.38E+07  | 3.58E+06  |
|           | 3-ethylcyclopentanone      | 1.15E+05     | 3.70E+04 | < DL      | < DL      | 6.61E+04  |
|           | (Z)-6-octen-2-one          | < DL         | < DL     | 1.8E+06   | 7.59E+06  | 2.16E+06  |
|           | 6-methyl-5-hepten-2-one    | 1.1E+05      | 1.04E+05 | < DL      | < DL      | < DL      |
|           | 2-octanone                 | 1.12E+06     | 3.12E+05 | < DL      | 1.56E+06  | 3.77E+05  |
|           | Acetophenone               | 1.82E+05     | < DL     | < DL      | < DL      | < DL      |
|           | 2-nonanone                 | 2.35E+06     | 5.22E+05 | < DL      | < DL      | 5.57E+05  |
|           | (E, E) -3,5-octadien-2-one | 2.22E+06     | 7.82E+04 | < DL      | 1.57E+06  | 3.07E+05  |

|  |                             |          |                 |                |          |          |
|--|-----------------------------|----------|-----------------|----------------|----------|----------|
|  | 3-nonen-2-one               | < DL     | 9.03E+03        | < DL           | < DL     | < DL     |
|  | 2-decanone                  | < DL     | < DL            | < DL           | 1.63E+06 | < DL     |
|  | 6-undecanone                | 1.14E+05 | < DL            | < DL           | < DL     | < DL     |
|  | Ethanol                     | < DL     | < DL            | 5.4E+07        | 6.50E+07 | 4.78E+07 |
|  | 1-propanol                  | < DL     | 1.12E+05        | < DL           | 6.90E+06 | 4.28E+06 |
|  | 2-methyl-1-propanol         | < DL     | < DL            | 2.7E+08        | 1.56E+08 | 4.58E+07 |
|  | 1-butanol                   | < DL     | 2.38E+05        | < DL           | 9.77E+05 | 3.77E+05 |
|  | 1-penten-3-ol               | 8.85E+05 | 1.67E+05        | 5.0E+05        | 1.27E+06 | 2.55E+05 |
|  | 3-methyl-1-butanol          | < DL     | < DL            | 4.4E+08        | 1.34E+08 | 1.13E+08 |
|  | 2-methyl-1-butanol          | < DL     | < DL            | 5.7E+07        | 5.57E+07 | 2.90E+07 |
|  | 1-pentanol                  | 1.51E+06 | 1.48E+06        | 1.6E+06        | 5,34E+06 | 1.10E+06 |
|  | 2,3-butanediol              | < DL     | < DL            | 2.4E+06        | < DL     | 3.73E+05 |
|  | 1-hexanol                   | < DL     | 7.30E+06        | 1.0E+07        | 2.89E+07 | 6.74E+06 |
|  | (S)-2-heptanol              | < DL     | < DL            | 1.0E+06        | < DL     | 2.53E+05 |
|  | 4-ethyl phenol              | 7.88E+05 | 2.43E+05        | 3.0E+05        | 5.95E+05 | 3.04E+05 |
|  | 1-Heptanol                  | < DL     | 3.12E+05        | < DL           | < DL     | 4.01E+05 |
|  | 1-octen-3-ol                | 4.86E+05 | 2.79E+05        | 3.6E+05        | 8.45E+05 | 3.71E+05 |
|  | 1-adamantanol               | 6.57E+05 | < DL            | < DL           | < DL     | 1.01E+05 |
|  | 1-octanol                   | < DL     | < DL            | <b>3.9E+05</b> | < DL     | 2.59E+05 |
|  | Phenylethyl alcohol         | < DL     | < DL            | < DL           | < DL     | 1.70E+06 |
|  | 3-methyl furan              | 5.62E+05 | 3.10E+05        | < DL           | 4.99E+05 | 2.21E+05 |
|  | 2-ethyl furan               | 1.98E+07 | 7.15E+06        | 7.5E+06        | 1.44E+07 | 8.35E+06 |
|  | 2,4-dimethylfuran           | < DL     | < DL            | < DL           | 1.18E+07 | < DL     |
|  | 2-propyl furan              | 5.62E+05 | 1.49E+05        | 3.7E+05        | 3.71E+05 | 1.47E+05 |
|  | Furfural                    | 6.44E+04 | < DL            | < DL           | < DL     | < DL     |
|  | 2-n-butyl furan             | 8.84E+04 | <b>3.36E+05</b> | 3.5E+05        | < DL     | 3.93E+05 |
|  | 2-pentyl furan              | 7.94E+07 | 1.21E+07        | 1.5E+07        | 3.86E+07 | 1.44E+07 |
|  | 2-hexyl furan               | 1.85E+05 | 1.60E+04        | < DL           | < DL     | < DL     |
|  | 2-n-heptyl furan            | 1.58E+05 | < DL            | < DL           | < DL     | < DL     |
|  | 2-n-octylfuran              | 5.62E+04 | < DL            | < DL           | < DL     | < DL     |
|  | Trans-2-(2-pentenyl) furan  | 1.52E+06 | 3.50E+05        | 4.0E+05        | 7.80E+05 | 4.29E+05 |
|  | Acetic acid, ethenyl ester  | < DL     | < DL            | 5.9E+05        | < DL     | 1.83E+06 |
|  | Butyl isocyanatoacetate     | < DL     | < DL            | 1.4E+06        | < DL     | 8.38E+05 |
|  | Acetic acid, methyl ester   | < DL     | < DL            | < DL           | 5.09E+05 | < DL     |
|  | Ethyl acetate               | < DL     | < DL            | 5.4E+08        | 5.53E+08 | 1.13E+08 |
|  | Propanoic acid, ethyl ester | < DL     | < DL            | 1.4E+07        | 6.44E+07 | 7.94E+06 |
|  | n-propyl acetate            | < DL     | < DL            | 3.09E+06       | 1.31E+07 | < DL     |

### Alcohols

### Furans

### Esters

|                                                |      |      |         |          |          |
|------------------------------------------------|------|------|---------|----------|----------|
| Propanoic acid, 2-methyl-, ethyl ester         | < DL | < DL | 2.5E+07 | 8.66E+05 | 6.07E+04 |
| Isobutyl acetate                               | < DL | < DL | 6.9E+06 | 3.21E+06 | < DL     |
| Acetic acid, butyl ester                       | < DL | < DL | < DL    | 4.04E+05 | < DL     |
| 1 butanol, 3-methyl-, acetate                  | < DL | < DL | 1.9E+07 | 2.36E+06 | 3.21E+05 |
| 1 butanol, 2-methyl-, acetate                  | < DL | < DL | 4.6E+06 | 4.96E+05 | < DL     |
| Acetic acid, pentyl ester                      | < DL | < DL | 5.0E+05 | 1.31E+06 | < DL     |
| 1-butanol, 3-methyl-, propanoate               | < DL | < DL | 9.4E+05 | < DL     | < DL     |
| Hexanoic acid, ethyl ester                     | < DL | < DL | 1.1E+06 | < DL     | 5.61E+05 |
| Propanoic acid, 2-methyl, 3-methylbutyl ester  | < DL | < DL | 4.3E+05 | < DL     | < DL     |
| Heptanoic acid, ethyl ester                    | < DL | < DL | < DL    | < DL     | 7.00E+04 |
| Acetic acid, hexyl ester                       | < DL | < DL | 5.1E+06 | 2.69E+06 | < DL     |
| Octanoic acid, ethyl ester                     | < DL | < DL | 3.1E+05 | < DL     | 4.2E+05  |
| Acetic acid, 2-phenylethyl ester               | < DL | < DL | 9.2E+06 | 1.44E+07 | 1.34E+05 |
| Propanoic acid, 2-phenylethyl ester            | < DL | < DL | 3.9E+05 | < DL     | < DL     |
| Propanoic acid, 2-methyl-, 2-phenylethyl ester | < DL | < DL | 3.5E+05 | < DL     | < DL     |
| Decanoic acid, ethyl ester                     | < DL | < DL | < DL    | < DL     | 6.94E+04 |
